# Supplementary material for: Microvascular Disease and Incident Heart Failure Among Individuals With Type 2 Diabetes Mellitus
Source: PubMed Central journal article supplement — J Am Heart Assoc. 2021 Jun 10;10(12):e018998. doi: 10.1161/JAHA.120.018998 (PMC8477890; doi:10.1161/jaha.120.018998), 2021-06-10
Supplement: JAH3-10-e018998-s001.pdf [file JAH3-10-e018998-s001.pdf]

# **SUPPLEMENTAL MATERIAL**

**Table S1. Baseline Characteristics of Participants by Evidence of Incident Heart Failure Over Time in the Look AHEAD Study.**

|                                    | <b>Entire Sample</b> | <b>No Incident Heart Failure</b> | <b>Incident Heart Failure</b> | <b>P Value</b> |
|------------------------------------|----------------------|----------------------------------|-------------------------------|----------------|
| N                                  | 4095                 | 3978                             | 117                           | ...            |
| Age, years                         | 58.3 (6.6)           | 58.2 (6.6)                       | 61.2 (6.4)                    | <0.001         |
| Women, %                           | 61.9                 | 62.3                             | 49.6                          | 0.005          |
| Race/ethnicity, %                  |                      |                                  |                               | 0.318          |
| White                              | 64.6                 | 64.7                             | 64.1                          |                |
| Non-Hispanic Black                 | 17.1                 | 16.9                             | 22.2                          |                |
| Hispanic                           | 14.8                 | 14.9                             | 10.3                          |                |
| Other/mixed                        | 3.5                  | 3.5                              | 3.4                           |                |
| Treatment assignment, %            |                      |                                  |                               | 0.238          |
| Diabetes Support and Education     | 50.2                 | 50.0                             | 55.6                          |                |
| Intensive Lifestyle Intervention   | 49.8                 | 50.0                             | 44.4                          |                |
| Body mass index, kg/m <sup>2</sup> | 36.0 (5.9)           | 36.0 (5.9)                       | 37.6 (6.5)                    | 0.003          |
| Waist circumference, cm            | 113.6 (14.1)         | 113.5 (14.0)                     | 119.7 (15.3)                  | <0.001         |
| Current smoking, %                 | 4.0                  | 4.0                              | 6.0                           | 0.268          |
| Alcohol drinking, %                | 32.7                 | 32.8                             | 29.9                          | 0.518          |
| Systolic blood pressure, mm Hg     | 129.0 (16.9)         | 128.9 (16.8)                     | 134.1 (18.1)                  | 0.001          |
| Diastolic blood pressure, mm Hg    | 70.4 (9.5)           | 70.4 (9.5)                       | 71.2 (9.7)                    | 0.387          |
| Hypertension, %                    | 85.6                 | 85.3                             | 93.2                          | 0.018          |
| Use of antihypertensive drug, %    | 70.9                 | 70.4                             | 86.3                          | <0.001         |
| Use of ACEI/ARB, %                 | 56.9                 | 56.6                             | 67.8                          | 0.017          |
| Use of beta blocker, %             | 17.0                 | 16.5                             | 35.0                          | <0.001         |
| Hemoglobin A <sub>1C</sub> , %     | 7.3 (1.2)            | 7.2 (1.2)                        | 7.6 (1.2)                     | 0.004          |
| Duration of diabetes, years        | 5.0 (2.0-9.0)        | 5.0 (2.0-9.0)                    | 6.0 (3.0-11.0)                | 0.012          |
| Use of insulin, %                  | 13.9                 | 13.5                             | 25.6                          | 0.001          |
| Use of antidiabetic medication, %  |                      |                                  |                               |                |
| Total cholesterol, mg/dL           | 193.1 (36.8)         | 193.3 (36.7)                     | 187.9 (38.6)                  | 0.123          |
| HDL-cholesterol, mg/dL             | 43.9 (11.9)          | 44.0 (12.0)                      | 41.7 (10.4)                   | 0.038          |
| LDL-cholesterol, mg/dL             | 114.4 (31.9)         | 114.5 (31.9)                     | 109.3 (32.7)                  | 0.081          |
| Total/HDL-cholesterol Ratio        | 4.7 (1.5)            | 4.7 (1.5)                        | 4.8 (1.5)                     | 0.443          |
| eGFR, mL/min/1.73m <sup>2</sup>    | 91.1 (15.8)          | 91.2 (15.7)                      | 87.5 (18.2)                   | 0.012          |
| Albumin-Creatinine Ratio           | 0.008 (0.005-0.017)  | 0.007 (0.005-0.011)              | 0.018 (0.007-0.057)           | <0.001         |
| MNSI Score                         | 1 (0-3)              | 1 (0-3)                          | 2 (1-3)                       | 0.009          |
| Nephropathy, %                     | 18.2                 | 17.5                             | 41.0                          | <0.001         |
| Retinopathy, %                     | 6.9                  | 6.8                              | 11.1                          | 0.071          |
| Neuropathy, %                      | 16.6                 | 16.4                             | 23.1                          | 0.057          |
| Microvascular disease, %           | 34.8                 | 34.0                             | 62.4                          | <0.001         |

Data are mean (standard deviation), median (interquartile range), or proportion (%) as appropriate.

AHEAD indicates Action for Health in Diabetes; ACE, angiotensin converting enzyme inhibitor; ARB, angiotensin receptor blocker; eGFR, estimated glomerular filtration rate; HDL, high-density lipoprotein; LDL, low-density lipoprotein; MNSI, Michigan Neuropathy Screening Instrument

**Table S2. Hazard Ratios for Incident Heart Failure by Microvascular Disease Status Stratified by Race/Ethnicity in the Look AHEAD Study.**

| Hazard ratio (95% CI)      | Nephropathy |                   | Retinopathy |                  | Neuropathy |                   | Microvascular disease |                   |
|----------------------------|-------------|-------------------|-------------|------------------|------------|-------------------|-----------------------|-------------------|
|                            | Absent      | Present           | Absent      | Present          | Absent     | Present           | Absent                | Present           |
| <b>White (n = 2647)</b>    |             |                   |             |                  |            |                   |                       |                   |
| <i>Model 1</i>             | Reference   | 2.57 (1.60-4.12)‡ | Reference   | 1.95 (0.97-3.92) | Reference  | 1.94 (1.17-3.21)* | Reference             | 3.26 (2.03-5.23)‡ |
| <i>Model 2</i>             | Reference   | 1.94 (1.19-3.18)† | Reference   | 1.70 (0.82-3.55) | Reference  | 1.85 (1.11-3.09)* | Reference             | 2.82 (1.72-4.61)‡ |
| <i>Model 3</i>             | Reference   | 1.90 (1.16-3.12)* | Reference   | 1.69 (0.81-3.53) | Reference  | 1.76 (1.05-2.95)* | Reference             | 2.71 (1.65-4.46)‡ |
| <b>Nonwhite (n = 1448)</b> |             |                   |             |                  |            |                   |                       |                   |
| <i>Model 1</i>             | Reference   | 3.35 (1.81-6.18)‡ | Reference   | 1.01 (0.36-2.85) | Reference  | 1.05 (0.44-2.49)  | Reference             | 2.60 (1.40-4.83)† |
| <i>Model 2</i>             | Reference   | 2.64 (1.38-5.05)† | Reference   | 0.80 (0.28-2.32) | Reference  | 0.98 (0.41-2.34)  | Reference             | 2.16 (1.14-4.09)* |
| <i>Model 3</i>             | Reference   | 3.37 (1.76-6.44)‡ | Reference   | 0.69 (0.24-2.01) | Reference  | 0.85 (0.35-2.09)  | Reference             | 2.31 (1.21-4.41)* |

Model 1 adjusted for age, sex and randomization arm. Model 2 includes variables in model 1 with further adjustment for body mass index, current smoking (yes/no), alcohol drinking (oz/week), systolic blood pressure, use of antihypertensive medications (yes/no), ratio of total to high-density lipoprotein cholesterol, hemoglobin A<sub>1c</sub>, duration of diabetes. Model 3 includes variables in model 2 with additional adjustment for interval development of coronary artery disease (as a time-dependent covariate).

AHEAD indicates Action for Health in Diabetes; CI, confidence interval.

\*  $P < 0.05$ , †  $P < 0.01$ , ‡  $P < 0.001$
